# Supplementary material for: Formation of cationic hydrophobic micro-blocks in P(AM-DMC) by template assembly: characterization and application in sludge dewatering
Source: Royal Society of Chemistry journal article supplement (doi:10.1039/c6ra27400e), 2017-01-01
Supplement: c6ra27400e1.pdf [file c6ra27400e1.pdf]

## Supporting Information

### **Formation of Cationic Hydrophobic Micro-blocks in P(AM-DMC) by Template Assembly: Characterization and Application in Sludge Dewatering**

Bingzhi Liu,<sup>ab</sup> Huaili Zheng,<sup>\*ab</sup> Xiangrui Deng,<sup>ab</sup> Bincheng Xu,<sup>ab</sup> Yongjun Sun,<sup>c</sup>  
Yongzhi Liu<sup>ab</sup> and Jianjun Liang.<sup>ab</sup>

<sup>a</sup> Key Laboratory of the Three Gorges Reservoir Region's Eco-Environment, State Ministry of Education, Chongqing University, Chongqing 400045, China. E-mail: 15922887515@163.com

<sup>b</sup> National Centre for International Research of Low-Carbon and Green Buildings, Chongqing University, Chongqing 400045, China

<sup>c</sup> Nanjing Technology University, College of Urban Construct, Nanjing 211800, Jiangsu, China.

\*Corresponding Author: Prof. Huaili Zheng

Tel.: +86 23 65120827; fax: +86 23 65120827.

E-mail: 15922887515@qq.com

### 1. Determination of charge density (CD).

The charge density (CD) is calculated by the following Equation:

$$CD (\%) = \frac{C (V - V_0)}{C (V - V_0) + \frac{m - C (V - V_0) M_{DMC}}{M_{AM}}} \quad (S1)$$

Where  $M_{DMC}$  (207.7 g • mol<sup>-1</sup>) and  $M_{AM}$  (71.08 g • mol<sup>-1</sup>) is the molar mass corresponding to the monomer, respectively;  $C$  (0.0025 mol • L<sup>-1</sup>) is the standard solution concentration of PVSK;  $V$  (mL) is the volume of PVSK solution consumed during titration, and  $V_0$  (mL) is the blank control consumption; and  $m$  (g) is the weight of the dried sample used for titration.

### 2. The data for Kelen-Tüdös Method

**Table S1** The data for Kelen-Tüdös Method under T/D = 0

| $f_{DMC}$ | $F_{DMC}$ | $R$    | $p$     | $H$    | $G$    | $\varepsilon$ | $\eta$ |
|-----------|-----------|--------|---------|--------|--------|---------------|--------|
| 0.1000    | 0.0435    | 9.0000 | 21.9885 | 3.6837 | 8.5907 | 0.7382        | 1.7214 |
| 0.2000    | 0.1028    | 4.0000 | 8.728   | 1.8332 | 3.5417 | 0.5838        | 1.1280 |
| 0.3000    | 0.1765    | 2.3333 | 4.6657  | 1.1669 | 1.8332 | 0.4717        | 0.7411 |
| 0.4000    | 0.2389    | 1.5000 | 3.1859  | 0.7063 | 1.0292 | 0.3509        | 0.5113 |
| 0.5000    | 0.3167    | 1.0000 | 2.1576  | 0.4635 | 0.5365 | 0.2618        | 0.3031 |

**Table S2** The data for Kelen-Tüdös Method under T/D = 0.5

| $f_{DMC}$ | $F_{DMC}$ | $R$    | $p$     | $H$    | $G$    | $\varepsilon$ | $\eta$ |
|-----------|-----------|--------|---------|--------|--------|---------------|--------|
| 0.1000    | 0.0795    | 9.0000 | 11.5789 | 6.9955 | 8.2227 | 0.7491        | 0.8805 |
| 0.2000    | 0.1807    | 4.0000 | 4.5340  | 3.5289 | 3.1178 | 0.6010        | 0.5310 |
| 0.3000    | 0.2739    | 2.3333 | 2.6510  | 2.0537 | 1.4531 | 0.4679        | 0.3305 |
| 0.4000    | 0.3781    | 1.5000 | 1.6448  | 1.3679 | 0.5880 | 0.3686        | 0.1584 |
| 0.5000    | 0.4397    | 1.0000 | 1.2742  | 0.7848 | 0.2152 | 0.2509        | 0.0688 |

### 3. Actual sludge flocs image

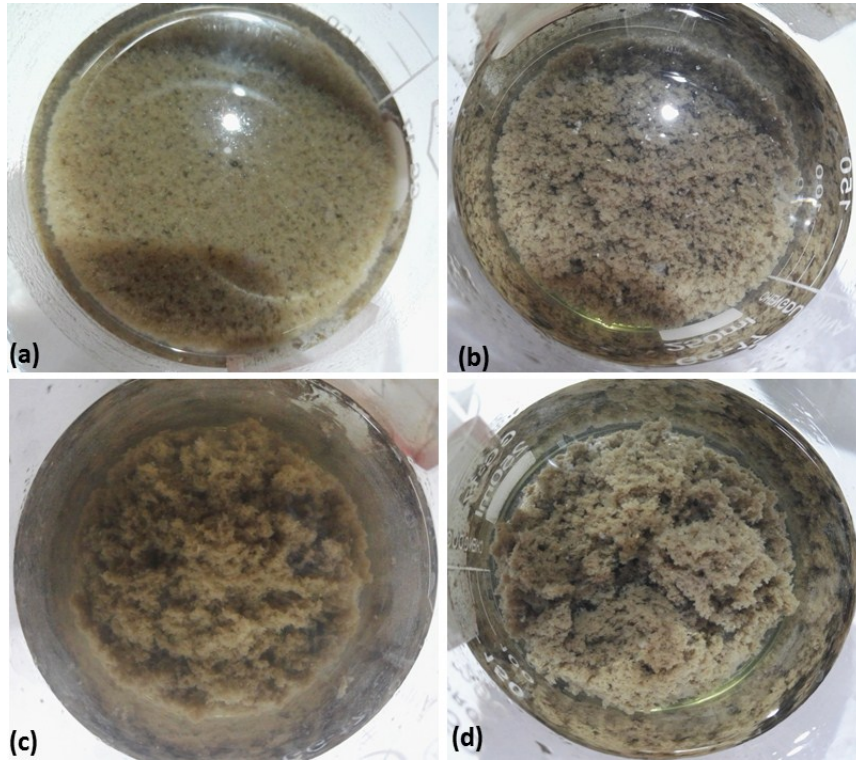

**Fig. S1** Actual image of (a) raw sludge, (b) sludge treated by PA-D<sub>2</sub>, (c) sludge treated by PA-D<sub>3</sub> and (d) sludge treated by TPA-D<sub>2</sub>.

#### 4. Optical microscopy images of sludge flocs

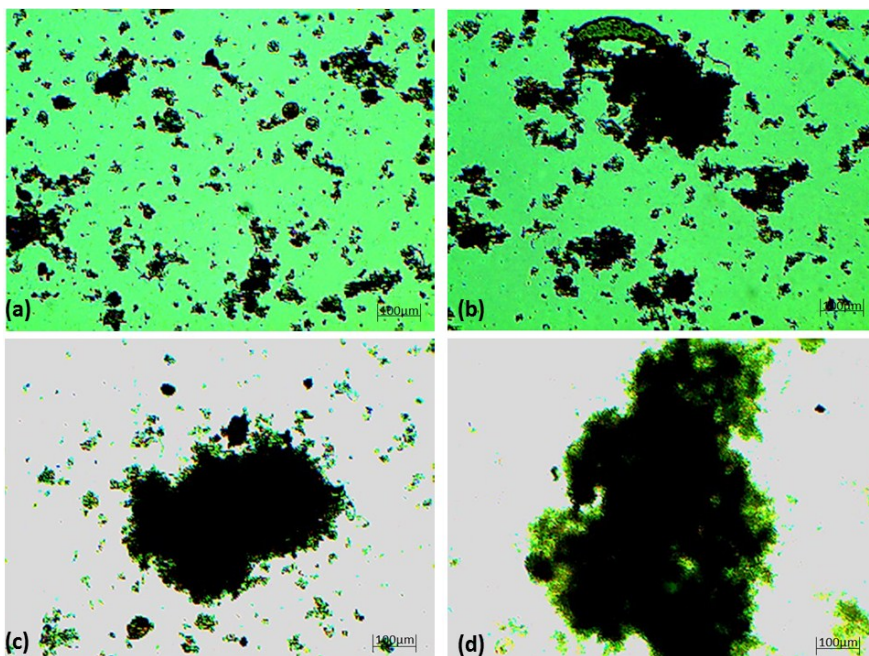

**Fig. S2** Optical microscopy images of (a) raw sludge, (b) sludge treated by PA-D<sub>2</sub>, (c) sludge treated by PA-D<sub>3</sub> and (d) sludge treated by TPA-D<sub>2</sub>.
